# Supplementary material for: Long-read DNA and cDNA sequencing identify cancer-predisposing deep intronic variation in tumor-suppressor genes
Source: HighWire-hosted journal article supplement (doi:10.1101/gr.279158.124), 2024-09-13
Supplement: Supplemental_Tables_S1-S4.xlsx [file Supplemental_Tables_S1-S4.xlsx]

## Sheet: Table S1
Supplemental Table S1. Sequences of barcoded adapters used in multiplex adaptive-sampling sequencing
Component	Forward sequence	Reverse sequence
NB01	CACAAAGACACCGACAACTTTCTT	AAGAAAGTTGTCGGTGTCTTTGTG
NB02	ACAGACGACTACAAACGGAATCGA	TCGATTCCGTTTGTAGTCGTCTGT
NB03	CCTGGTAACTGGGACACAAGACTC	GAGTCTTGTGTCCCAGTTACCAGG
NB04	TAGGGAAACACGATAGAATCCGAA	TTCGGATTCTATCGTGTTTCCCTA
NB05	AAGGTTACACAAACCCTGGACAAG	CTTGTCCAGGGTTTGTGTAACCTT
NB06	GACTACTTTCTGCCTTTGCGAGAA	TTCTCGCAAAGGCAGAAAGTAGTC
NB07	AAGGATTCATTCCCACGGTAACAC	GTGTTACCGTGGGAATGAATCCTT
NB08	ACGTAACTTGGTTTGTTCCCTGAA	TTCAGGGAACAAACCAAGTTACGT
NB09	AACCAAGACTCGCTGTGCCTAGTT	AACTAGGCACAGCGAGTCTTGGTT
NB10	GAGAGGACAAAGGTTTCAACGCTT	AAGCGTTGAAACCTTTGTCCTCTC
NB11	TCCATTCCCTCCGATAGATGAAAC	GTTTCATCTATCGGAGGGAATGGA
NB12	TCCGATTCTGCTTCTTTCTACCTG	CAGGTAGAAAGAAGCAGAATCGGA
NB13	AGAACGACTTCCATACTCGTGTGA	TCACACGAGTATGGAAGTCGTTCT
NB14	AACGAGTCTCTTGGGACCCATAGA	TCTATGGGTCCCAAGAGACTCGTT
NB15	AGGTCTACCTCGCTAACACCACTG	CAGTGGTGTTAGCGAGGTAGACCT
NB16	CGTCAACTGACAGTGGTTCGTACT	AGTACGAACCACTGTCAGTTGACG
NB17	ACCCTCCAGGAAAGTACCTCTGAT	ATCAGAGGTACTTTCCTGGAGGGT
NB18	CCAAACCCAACAACCTAGATAGGC	GCCTATCTAGGTTGTTGGGTTTGG
NB19	GTTCCTCGTGCAGTGTCAAGAGAT	ATCTCTTGACACTGCACGAGGAAC
NB20	TTGCGTCCTGTTACGAGAACTCAT	ATGAGTTCTCGTAACAGGACGCAA
NB21	GAGCCTCTCATTGTCCGTTCTCTA	TAGAGAACGGACAATGAGAGGCTC
NB22	ACCACTGCCATGTATCAAAGTACG	CGTACTTTGATACATGGCAGTGGT
NB23	CTTACTACCCAGTGAACCTCCTCG	CGAGGAGGTTCACTGGGTAGTAAG
NB24	GCATAGTTCTGCATGATGGGTTAG	CTAACCCATCATGCAGAACTATGC

## Sheet: Table S2
Supplemental Table S2. Genes and regions targeted by adaptive-sampling sequencing
Gene	Target region (GRCh38/hg38)
ATM	chr11:107795967-108795966
BARD1	chr2:214269128-215269129
BRCA1	chr17:42584888-43659538
BRCA2	chr13:31857576-32857575
BRIP1	chr17:61271373-62271373
CHEK2	chr22:28214789-29214788
PALB2	chr16:23122260-24122260
RAD51C	chr17:58213467-59213467
RAD51D	chr17:34603137-35603137
TP53	chr17:7177975-8177976

## Sheet: Table S3
Supplemental Table S3. Rare deep intronic variants in ten breast cancer genes in familes severely affected with breast, ovarian, pancreatic and/or metastatic prostate cancer, but with no causal variant identified by any pevious genomic approach
Chr	Genomic position (hg38)	Ref	Var	gnomAD non-cancer v.3.1.2	Gene	Intronic position	SpliceAI scores for acceptor or donor gains	Pangolin score for splice gain	Result of long-read transcript analysis	Family
2	214729341	G	C	0	BARD1	c.2002-333C>G	0	0		CF3795
2	214733044	G	T	1	BARD1	c.1904-2536C>A	0	0		CF1459
2	214745016	A	G	0	BARD1	c.1903+51T>C	0	0		CF4664
2	214755002	T	C	3	BARD1	c.1569-2447A>G	0	0.01		CF3602
2	214755957	T	C	0	BARD1	c.1569-3402A>G	0.01	0.01		CF4100
2	214769418	G	A	1	BARD1	c.1315-106C>T	0	0		CF4552
2	214770392	A	T	2	BARD1	c.1315-1080T>A	0.01	0		CF742
2	214779196	A	C	0	BARD1	c.1314+1364T>G	0	0		CF742
2	214780352	A	G	0	BARD1	c.1314+208T>C	0	0		CF4874
2	214809273	G	C	2	BARD1	c.158+139C>G	0	0		CF3749
11	108228144	T	G	0	ATM	c.185+256T>G	0	0		CF71
11	108228660	C	T	4	ATM	c.186-518C>T	0	0		CF1292
11	108250007	T	A	0	ATM	c.1236-694T>A	0	0		CF2939
11	108250339	G	T	2	ATM	c.1236-362G>T	0	0		CF4848
11	108256869	A	G	2	ATM	c.2250+529A>G	0.01	0.01		CF5259
11	108258324	G	C	1	ATM	c.2377-662G>C	0	0		CF3804
11	108258360	A	G	0	ATM	c.2377-626A>G	0	0		CF3547
11	108260059	A	G	0	ATM	c.2466+984A>G	0.03	0.02		CF469
11	108271641	C	G	0	ATM	c.3077+235C>G	0.01	0		CF4102
11	108273848	C	T	2	ATM	c.3284+996C>T	0	0.01		CF5082
11	108281633	A	G	0	ATM	c.3576+465A>G	0	0	normal splicing	CF1869
11	108289169	A	G	2	ATM	c.4236+66A>G	0	0.03		CF61
11	108300104	T	G	0	ATM	c.5177+219T>G	0	0		CF4727
11	108304050	T	G	4	ATM	c.5497+625T>G	0	0		CF681
11	108309080	A	G	3	ATM	c.5763-1080A>G	0.24; 0.47	0.19	pseudoexon	CF5431
11	108309104	G	A	0	ATM	c.5763-1056G>A	0.37; 0.41	0.15	pseudoexon	CF6072
11	108344075	G	T	0	ATM	c.8418+704G>T	0.14; 0.06	0.08	pseudoexon	CF6132
13	32315883	C	T	0	BRCA2	c.-40+216C>T	0.01	0.01	normal splicing	CF4791
13	32316855	C	G	1	BRCA2	c.67+328C>G	0	0		CF4505
13	32325849	A	G	3	BRCA2	c.426-252A>G	0.03	0.09	normal splicing	CF4385
13	32326774	T	C	0	BRCA2	c.631+161T>C	0	0		CF4486
13	32329017	C	T	3	BRCA2	c.632-426C>T	0	0		CF518
13	32335850	A	G	0	BRCA2	c.1910-415A>G	0	0		CF4598
13	32342458	A	G	3	BRCA2	c.6841+1262A>G	0	0	normal splicing	CF4419
13	32346492	A	T	0	BRCA2	c.6938-335A>T	0	0		CF1172
13	32363756	A	C	1	BRCA2	c.8331+223A>C	0	0		CF1474
16	23608345	G	A	1	PALB2	c.3202-333C>T	0	0		CF4812
16	23614330	T	A	0	PALB2	c.3114-239A>T	0.71;0.82	0.75	pseudoexon	CF3302
16	23622118	G	A	2	PALB2	c.2997-640C>T	0	0		CF469
16	23622844	C	T	2	PALB2	c.2996+125G>A	0	0		CF1329
16	23627100	C	T	1	PALB2	c.2587-703G>A	0	0	normal splicing	CF4673
16	23628411	C	A	1	PALB2	c.2586+793G>T	0	0		CF450
16	23628945	A	G	0	PALB2	c.2586+259T>C	0	0		CF4874
16	23640667	T	A	0	PALB2	c.48+443A>T	0	0		CF1610
17	7673181	G	T	0	TP53	c.993+354C>A	0.02	0		CF4730
17	35116352	G	A	3	RAD51D	c.323+507C>T	0	0		CF1292
17	43047399	C	T	0	BRCA1	c.5467+244G>A	0	0		CF5231
17	43049663	A	T	2	BRCA1	c.5333-469T>A	0.01	0.02	normal splicing	CF181, CF3311, CF4942
17	43050909	G	A	1	BRCA1	c.5332+154C>T	0	0		CF4531
17	43051816	T	C	3	BRCA1	c.5278-699A>G	0	0		CF821
17	43053187	C	T	1	BRCA1	c.5278-2070G>A	0.01	0.01		CF60
17	43060453	G	A	2	BRCA1	c.5193+2880C>T	0	0		CF73
17	43062825	G	A	2	BRCA1	c.5193+510C>T	0	0		CF1757, CF5081
17	43063415	A	G	0	BRCA1	c.5153-42T>C	0	0		CF4512
17	43064401	C	G	0	BRCA1	c.5075-450G>C	0	0		CF1173
17	43064435	C	A	0	BRCA1	c.5075-484G>T	0	0		CF1888
17	43067036	T	G	2	BRCA1	c.5074+572A>C	0	0		CF4675
17	43069047	T	C	0	BRCA1	c.4987-1352A>G	0.45; 0.47	0.41	pseudoexon	CF3679, CF6196
17	43069946	T	C	0	BRCA1	c.4986+982A>G	0.02	0.01	normal splicing	CF2190
17	43070859	C	T	0	BRCA1	c.4986+69G>A	0.00;0.83	0.51	pseudoexon	CF4455
17	43071829	C	T	1	BRCA1	c.4986-591G>A	0.03	0.03		CF2011
17	43075761	T	C	1	BRCA1	c.4484+727A>G	0	0		CF602
17	43077087	A	C	2	BRCA1	c.4358-473T>G	0.85;0.65	0.72	pseudoexon	CF4358
17	43082285	A	G	0	BRCA1	c.4357+119T>C	0	0		CF2442
17	43082320	G	A	1	BRCA1	c.4357+84C>T	0	0	normal splicing	CF4782
17	43082350	A	C	0	BRCA1	c.4357+54T>G	0	0		CF3355
17	43089613	T	C	1	BRCA1	c.4185+1331A>G	0	0.02	normal splicing	CF2718
17	43096714	A	G	0	BRCA1	c.593+530T>C	0	0		CF4731
17	43099926	T	C	1	BRCA1	c.442-46A>G	0.01	0.06		CF4100
17	43101775	T	A	0	BRCA1	c.442-1895A>T	0	0	normal splicing	CF1329
17	43104528	T	G	0	BRCA1	c.302-267A>C	0	0		CF1155
17	43106595	A	C	0	BRCA1	c.135-62T>G	0.05	0.04	normal splicing	CF4900
17	43107056	A	T	1	BRCA1	c.135-523T>A	0	0.01		CF5259
17	43110725	A	C	0	BRCA1	c.135-3141T>G	0.01	0.01		CF1287
17	43112759	T	A	0	BRCA1	c.134+2967A>T	0.01	0.01		CF4511, CF4950
17	43113428	A	G	0	BRCA1	c.134+2298T>C	0	0		CF1783
17	43115426	C	T	1	BRCA1	c.134+300G>A	0	0		CF1764
17	43120088	C	T	3	BRCA1	c.80+3929G>A	0	0		CF1830
17	43120752	G	A	2	BRCA1	c.80+3265C>T	0	0		CF1600
17	43123589	C	T	0	BRCA1	c.80+428G>A	0	0		CF4589
17	43123619	A	C	0	BRCA1	c.80+398T>G	0.03; 0.06	0.05	normal splicing	CF1675
17	58728378	G	T	0	RAD51C	c.966-4106G>T	0	0		CF3308
17	58730519	T	G	0	RAD51C	c.966-1965T>G	0	0	normal splicing	CF73
17	58732026	A	G	3	RAD51C	c.966-458A>G	0	0		CF4641
17	61728243	T	C	0	BRIP1	c.2380-12180A>G	0	0		CF998
17	61848159	A	T	0	BRIP1	c.508-939T>A	0	0		CF2650
17	61849041	C	A	0	BRIP1	c.507+88G>T	0	0		CF4812
17	61858976	A	T	0	BRIP1	c.205+820T>A	0	0		CF4770
17	61861184	A	G	0	BRIP1	c.93+263T>C	0	0		CF1173
17	61862863	C	A	1	BRIP1	c.-31+421G>T	0	0		CF4508
22	28698708	G	A	4	CHEK2	c.1137+1130C>T	0	0		CF1660
22	28704643	T	C	2	CHEK2	c.976-1077A>G	0	0.01	normal splicing	CF3961

## Sheet: Table S4
Supplemental Table S4. Gene specific primers used in cDNA synthesis
Gene	Sequence	NCBI RefSeq (MANE SELECT)	Primer binding location
ATM	CCAACATTCAAAAAAACCCACAATAGTTCAC	NM_000051.4	c.9453 - c.9423
BARD1	TACAATGACTGGGCTCTCACAAACCGTGC	NM_000465.4	c.2511 - c.2483
BRCA1	GGCAGATTTCCAAGGGAGACTTCAAGCAG	NM_007294.4	c.5913 - c.5885
BRCA2	AAACGATTTTTGCCCGATACACAAACGCTG	NM_000059.4	c.10616 - c.10587
BRIP1	ACTTACAACAGAGTTTAACATAAGCATGATGAC	NM_032043.3	c.4090 - c.4058
CHEK2	AAGGTACATTTCTTTCGTGTTCAAACCACG	NM_007194.4	c.1724 - c.1695
PALB2	CATCCAAGATCAGTGGTGCTACCATCATTAG	NM_024675.4	c.3884 - c.3854
RAD51C	GTCCACTTGTACACATTGATTTCACAACATC	NM_058216.3	c.1238 - c.1208
RAD51D	GGCGTTACTGGGAAGAAAAGTTGGGAGGG	NM_002878.4	c.1302 - c.1274
TP53	ATCCTCCTCCCCACAACAAAACACCAGTGC	NM_000546.6	c.1520 - c.1491
